# Supplementary material for: One of the Deepest Genera of Antipatharia: Taxonomic Position Revealed and Revised
Source: MDPI journal article supplement (doi:10.3390/d15030436), 2023-03-16
Supplement: s1 [file s1]

Archive with 1 entries (1 files):
- diversity-2165680-supplementary.pdf
