# Supplementary material for: One of the Deepest Genera of Antipatharia: Taxonomic Position Revealed and Revised
Source: MDPI journal article supplement (doi:10.3390/d15030436), 2023-03-16
Supplement: s1 [file s1 › diversity-2165680-supplementary.pdf]

**Table S1.** Comparison of *Abyssopathes* Opresko, 2002 with other hitherto known genera of Cladopathidae and Schizopathidae [3,6,7,9,13-18].

| Genus                | Mature corallum growth form | Striatum | Primary pinnulation                   | Typical number of rows of primary pinnules | Lateral or posterolateral pinnules                | Anterior or anterolateral pinnules | Polyp transverse diameter (mm) | Spines                                    |
|----------------------|-----------------------------|----------|---------------------------------------|--------------------------------------------|---------------------------------------------------|------------------------------------|--------------------------------|-------------------------------------------|
| <i>Abyssopathes</i>  | monopodial                  | present  | laterals regular; anteriors irregular | 3 to 4                                     | simple; basal subopposite others alternating      | simple or subpinnulate             | 5.0–6.0                        | triangular, compressed                    |
| <b>CLADOPATHIDAE</b> |                             |          |                                       |                                            |                                                   |                                    |                                |                                           |
| <i>Chrysopathes</i>  | branched                    | present  | regular; in biserial groups           | 5 to 6                                     | subpinnulate; basal subopposite other alternating | subpinnulate                       | 1.5–3.3                        | conical to triangular; inclined distally  |
| <i>Cladopathes</i>   | densely branched            | no data  | irregular                             | 4 to 5                                     | simple; alternating                               | subpinnulate                       | 3.0–6.0                        | triangular, compressed; inclined distally |
| <i>Heteropathes</i>  | monopodial                  | present  | laterals regular; anteriors irregular | 3 to 4                                     | simple; basal subopposite other alternating       | subpinnulate                       | 5.0–6.0                        | conical to triangular; inclined distally  |
| <i>Hexopathes</i>    | monopodial                  | present  | laterals regular; anteriors irregular | 3 to 4                                     | simple; basal subopposite others alternating      | simple or subpinnulate             | 3.0–6.0                        | conical to triangular; inclined distally  |

|                     |                                    |                                |                                   |        |                                                                 |              |         |                                                   |
|---------------------|------------------------------------|--------------------------------|-----------------------------------|--------|-----------------------------------------------------------------|--------------|---------|---------------------------------------------------|
| <i>Trissopathes</i> | laxly or<br>densely<br>branched    | at least in<br>some<br>species | regular;<br>in biserial<br>groups | 3 to 4 | usually<br>simple; basal<br>subopposite<br>other<br>alternating | subpinnulate | 2.0–4.0 | conical to<br>triangular;<br>inclined<br>distally |
| <i>Sibopathes</i>   | monopodial<br>or laxly<br>branched | present                        | regular;<br>in biserial<br>groups | 4 to 6 | simple; basal<br>subopposite<br>other<br>alternating            | simple       | 1.8–2.5 | triangular,<br>compressed<br>laterally            |

#### SCHIZOPATHIDAE

|                          |                                     |                      |                                   |   |                                                     |        |         |                                            |
|--------------------------|-------------------------------------|----------------------|-----------------------------------|---|-----------------------------------------------------|--------|---------|--------------------------------------------|
| <i>Alternatipathes</i>   | monopodial<br>or rarely<br>branched | absent               | regular                           | 2 | simple,<br>alternating                              | absent | 2.0–7.0 | conical to<br>triangular                   |
| <i>Bathypathes</i>       | monopodial,<br>rarely<br>branched   | present or<br>absent | regular                           | 2 | simple; all<br>subopposite<br>or all<br>alternating | absent | 2.0–17  | usually conical<br>to triangular           |
| <i>Dendrobathypathes</i> | sparsely to<br>densely<br>branched  | no data              | regular                           | 2 | subpinnulate;<br>all alternating                    | absent | 2.5–5.0 | triangular to<br>subconical                |
| <i>Dendropathes</i>      | densely<br>branched                 | no data              | regular;<br>in biserial<br>groups | 4 | simple; all<br>alternating                          | simple | up to 3 | subconical                                 |
| <i>Diplopathes</i>       | laxly<br>branched                   | no data              | regular                           | 2 | simple; all<br>alternating                          | absent | up to 4 | triangular and<br>compressed to<br>conical |
| <i>Lillipathes</i>       | usually<br>laxly<br>branched        | present              | regular;<br>in biserial<br>groups | 4 | simple; all<br>alternating                          | simple | 1.8–3.3 | triangular,<br>compressed                  |

|                      |                                                           |                                |                                   |         |                                               |              |         |                                             |
|----------------------|-----------------------------------------------------------|--------------------------------|-----------------------------------|---------|-----------------------------------------------|--------------|---------|---------------------------------------------|
| <i>Parantipathes</i> | monopodial<br>or laxly<br>branched                        | present or<br>absent           | regular;<br>in biserial<br>groups | 6 to 12 | simple; all<br>alternating                    | simple       | 1.6–3.3 | triangular to<br>conical                    |
| <i>Saropathes</i>    | monopodial?                                               | no data                        | regular;<br>in biserial<br>groups | 4       | subpinnulate;<br>all alternating              | subpinnulate | 1.5–3.0 | triangular,<br>compressed                   |
| <i>Schizopathes</i>  | monopodial                                                | absent                         | regular                           | 2       | simple; all<br>alternating                    | absent       | 3.0–6.0 | triangular,<br>compressed                   |
| <i>Stauropathes</i>  | sparsely or<br>densely<br>branched                        | at least in<br>some<br>species | regular                           | 2       | simple;<br>all<br>subopposite                 | absent       | 3.0–6.0 | triangular,<br>compressed                   |
| <i>Taxipathes</i>    | sparsely<br>branched                                      | no data                        | regular;<br>in biserial<br>groups | 6       | simple; all<br>alternating                    | simple       | 2.5     | conical, hooked                             |
| <i>Telopathes</i>    | sparsely<br>branched                                      | no data                        | irregular                         | 2       | simple<br>alternating or<br>subopposite       | absent       | 4.0–7.1 | conical,<br>compressed                      |
| <i>Umbellapathes</i> | monopodial-<br>like; stalked<br>with<br>branched<br>crown | absent                         | regular                           | 2 /     | simple or<br>subpinnulate;<br>all alternating | absent       | 3.0–4.0 | conical to<br>acute, subequal<br>or unequal |
